# Supplementary material
Source: PubMed Central journal article supplement (PMC5705815)
Supplement: MCB.00292-17_zmb999101661s1.pdf [file MCB.00292-17_zmb999101661s1.pdf]

***Heat Shock Protein* Genes Undergo Dynamic Alteration in  
Their 3D Structure and Genomic Organization In Response  
To Thermal Stress**

Surabhi Chowdhary, Amoldeep S. Kainth and David S. Gross

**Supplemental Figures  
Supplemental Tables**

**A**

Taq I sites

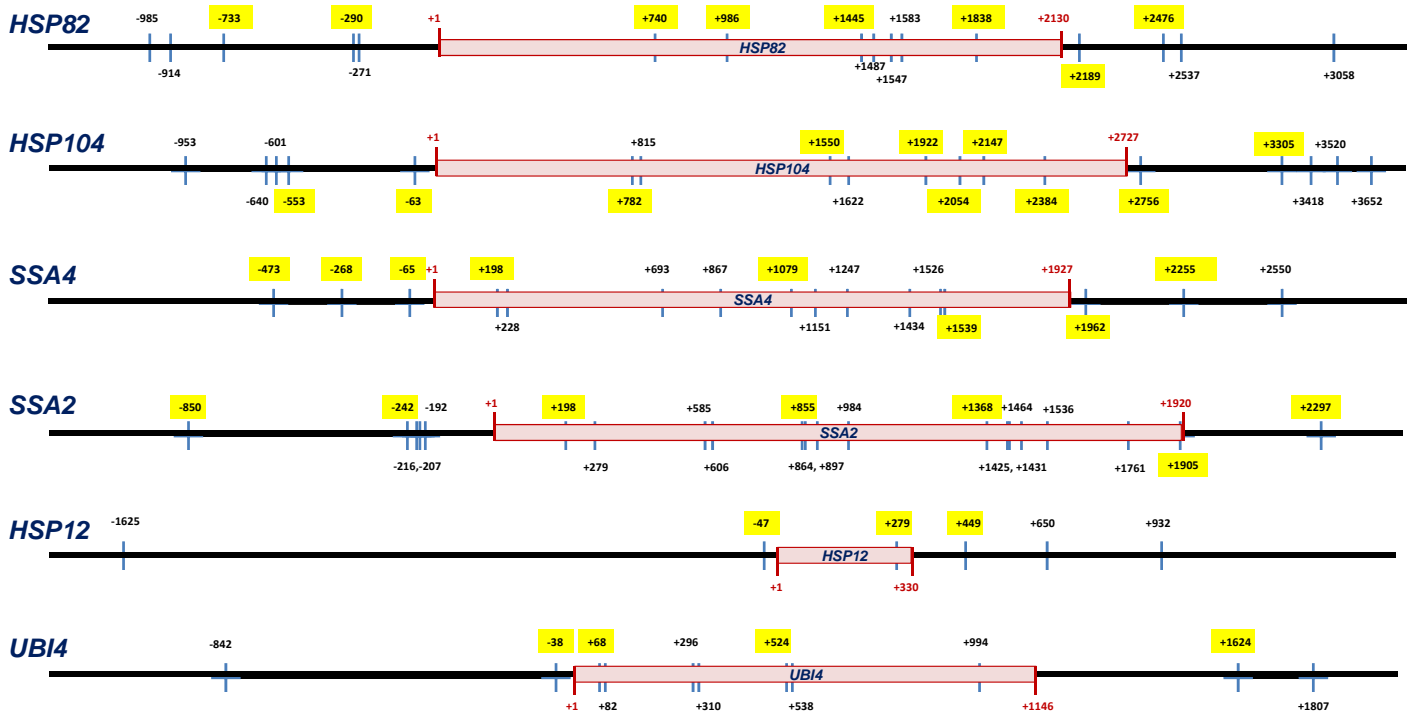

**B**

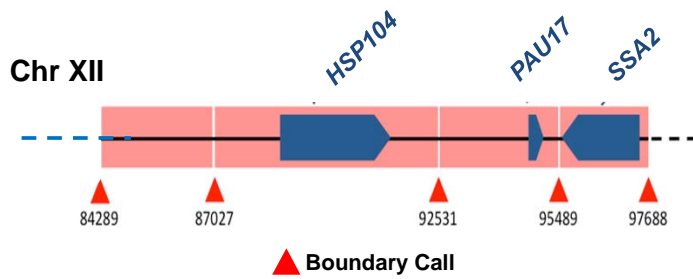

**Figure S1. Distribution of Taq I sites within *Heat Shock Protein* genes**

- A. Taq I restriction maps of *HSP* genes surveyed in this work. Coordinates correspond to the location of Taq I sites (vertical blue lines) and are numbered relative to the ATG initiation codon (+1). Initiation and termination codons are indicated in red. Each map depicts the genomic locus encompassing the ORF (pink rectangle)  $\pm 1$  kb region. Taq I sites highlighted in yellow correspond to those tested by 3C.
- B. Chromosomal interaction domain (CID) map of the indicated region within Chr. XII as defined by Micro-C analysis.

**A**

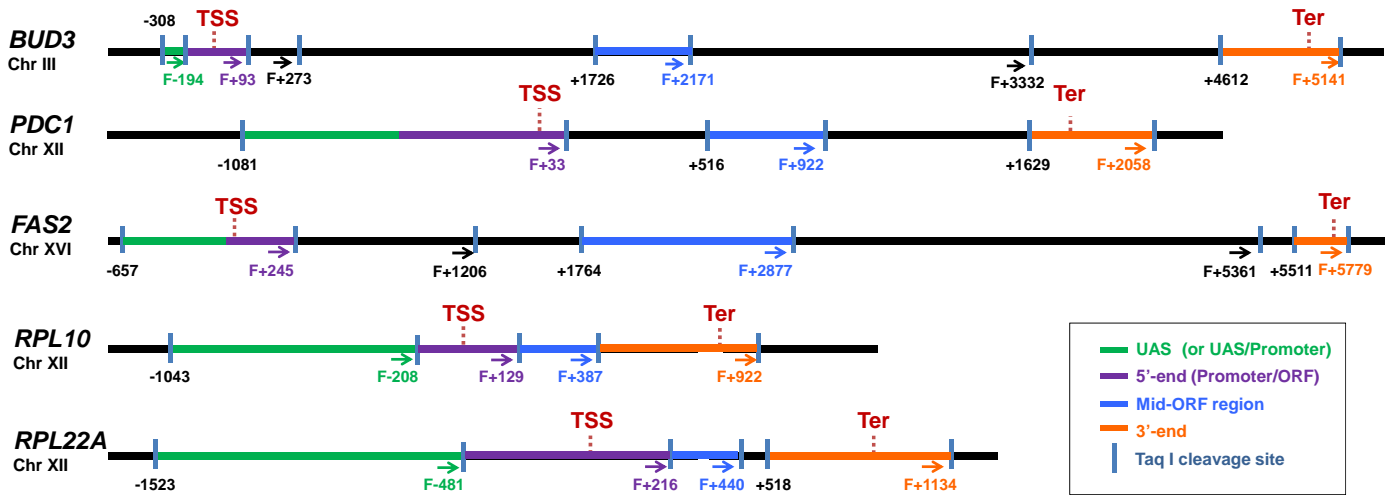

**B**

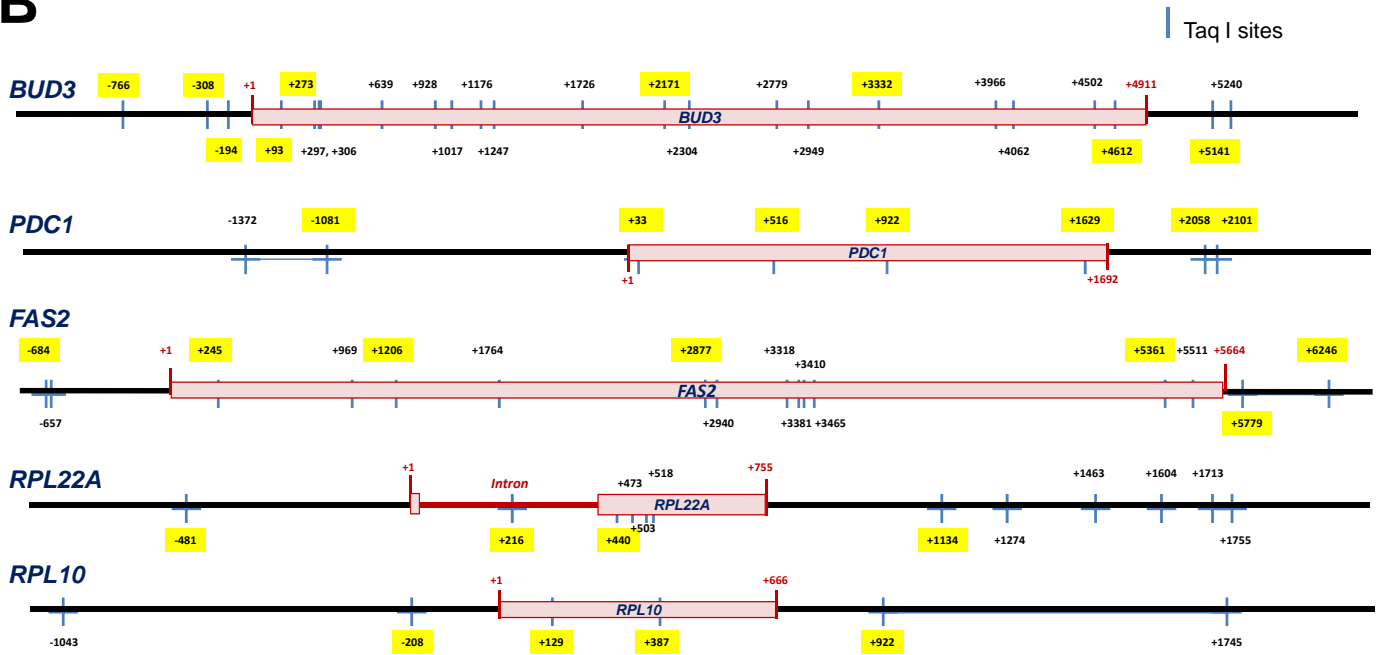

**Figure S2. Distribution of Taq I sites within constitutively expressed genes**

- A. Color-coded maps of constitutively expressed genes evaluated in this study. Abbreviations, symbols and color coding as in Fig. 1A.
  
- B. Taq I restriction maps of constitutively transcribed genes surveyed in this work. Presentation as in Fig. S1A.

**A**

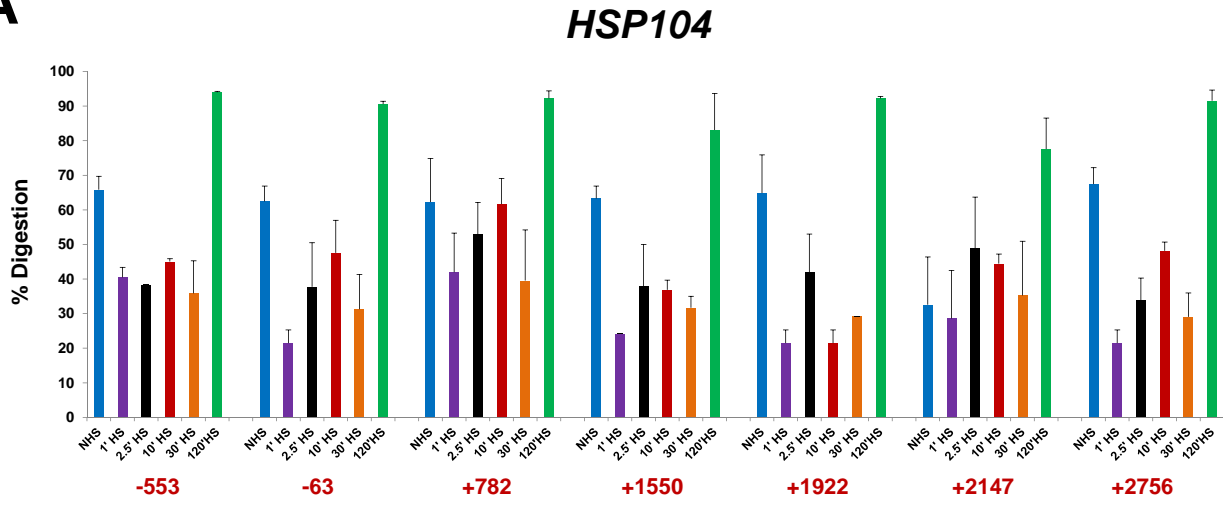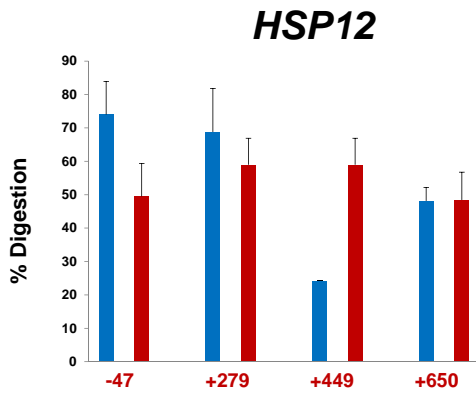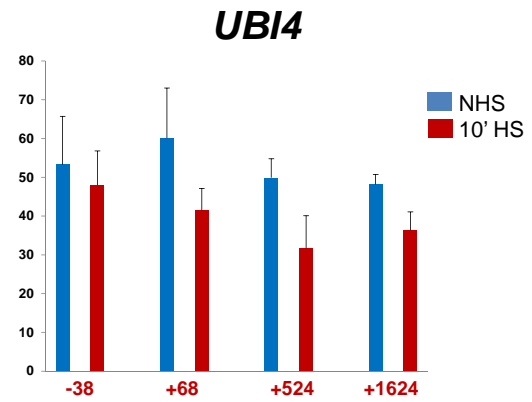

**B**

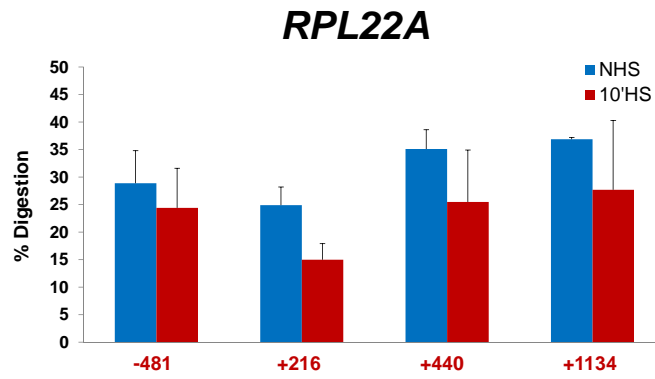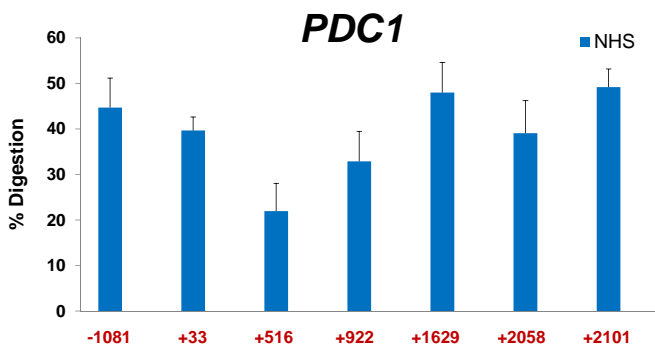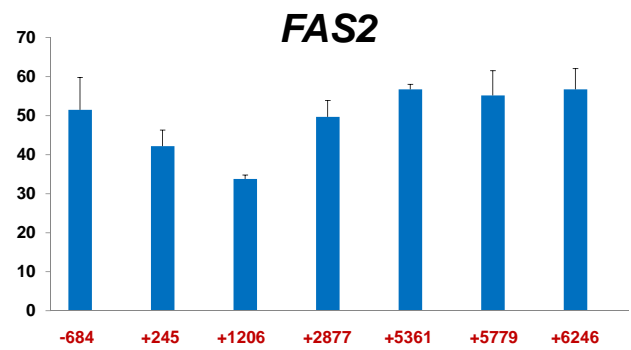

**Figure S3. Efficiency of Taq I digestion of crosslinked chromatin**

- A. Efficiency of cleavage of Taq I sites within representative *HSP* genes. Templates used were crosslinked chromatin samples isolated from non-heat-shocked (NHS) cells or cells subjected to 30° to 39°C heat shock (HS) for the indicated times (strain BY4741). Quantification at each Taq I site, whose location relative to ATG codon is indicated, was done using qPCR. Depicted are means + SD from two independent biological samples.
- B. Efficiency of cleavage of Taq I sites within representative constitutively expressed genes. Templates were isolated from either NHS or 10 min HS cells and processed as above.

## SUPPLEMENTAL TABLES

**Table S1. Forward (F) Primer Sequences Used in 3C Analysis**

| Name          | Sequence (5' → 3')          |
|---------------|-----------------------------|
| HSP82 F-733   | GATCTAACGGTTCACCTGTGTAGGC   |
| HSP82 F-290   | CCTCTCTCAACACAGTAATCCATAAAC |
| HSP82 F+740   | AATTAGTCGTCACCAAGGAAGTTG    |
| HSP82 F+986   | AGACCCATTGTACGTTAAGCATTTT   |
| HSP82 F+1445  | GCCAGAACACCAAAGAACATCTAC    |
| HSP82 F+1838  | ACATGGAAAGAATCATGAAGGCTC    |
| HSP82 F+2189  | ATGAGGATGAAGAAACAGAGACTGC   |
| HSP82 F+2476  | AAAGGGTATGTTGAAACTCATCTGC   |
| HSP104 F-553  | ATGAGGTAGTAGAACAAGATGGCG    |
| HSP104 F-63   | AGGCATTGTAATCTTGCCTCAATTC   |
| HSP104 F+782  | GTAAGACCGCTATTATTGAAGGTG    |
| HSP104 F+1550 | CCCTTGATGCTGAACGTAGATATG    |
| HSP104 F+1922 | TTTAGCTAATCCAAGGCAACCAG     |
| HSP104 F+2054 | GAAGTATGCGGTCTCTAAGTTGTTG   |
| HSP104 F+2147 | ATGAAGTAGAAAAGGCACATCCTG    |
| HSP104 F+2384 | CATGACTTCCAATCTAGGTGCTG     |
| HSP104 F+2756 | AGGTGATGACGATAATGAGGACAG    |
| HSP104 F+3305 | GTGCCAATATAATGTTACAGCGAAC   |
| SSA2 F-850    | GTTCACTCCAAGATTTTCATTCAGC   |
| SSA2 F-242    | CACTGCATTCTTACTCTCTCTTGG    |
| SSA2 F+198    | AGGTAACAGAACCACTCCATCTTTC   |
| SSA2 F+855    | AAGGACTTGTCTACCAACCAAAGAG   |
| SSA2 F+1368   | TCTCTACTTATGCTGACAACCAACC   |



|             |                             |
|-------------|-----------------------------|
| SSA2 F+1905 | CTAAATTGTACCAAGCTGGTGGTG    |
| SSA2 F+2297 | AGTGACTTGAAGACTAGGAATATCG   |
| SSA4 F-473  | ACGTAAGATTCGTTGTATGTGCG     |
| SSA4 F-268  | ACACGAAAGATATCTCAACTCTAGCC  |
| SSA4 F-65   | AGTTCCTAGAACCTTATGGAAGCAC   |
| SSA4 F+198  | GCCTTCTTATGTGGCTTTTACTGAC   |
| SSA4 F+1079 | TGCTGATTTGTTTAGATCTACATTGG  |
| SSA4 F+1539 | ATCTACTGGGTAAATTTGAGTTGAGC  |
| SSA4 F+1962 | GAGGAATACAAGGAAAGGCAAAG     |
| SSA4 F+2255 | ATAAGAAAGTCATCGCCAAACAAC    |
| HSP12 F-47  | ACGTATAAATAGGACGGTGAATTGC   |
| HSP12 F+279 | AAAAGGCAAGGATAACGCTGAAG     |
| HSP12 F+449 | TTTTCTTTATGATGTGTGATGTTCC   |
| UBI4 F-38   | ATTCGCCTGCTTATCTTTCTTCTTC   |
| UBI4 F+68   | ACTCTCCCTCCCCTTTACTTTAAC    |
| UBI4 F+524  | GTAAGCAGCTAGAAGATGGTAGAACC  |
| UBI4 F+1624 | TGATACGGATAGAATATTGTGACTACC |
| BUD3 F-766  | ATGTGTCTCTCTGGTCTCAAATTC    |
| BUD3 F-308  | AGCAAGAAACACAACAGTATAAAGG   |
| BUD3 F-194  | GCTCTTTGTCATACGCATAGAATTG   |
| BUD3 F+93   | AAGACCTGTCGTCTTTTACTCTG     |
| BUD3 F+273  | TCAGTATTCTATCACGGGTCAGATG   |
| BUD3 F+2171 | CGTCTTAACCAAACATGACGATAAAC  |
| BUD3 F+3332 | ACGATGAACACAGACAGAATGAAAG   |
| BUD3 F+4612 | ATGCTCAGAAAGTTCAAGAGTCTCC   |
| BUD3 F+5141 | TTTGGATCAATAGGGGTTCCATC     |
| BUD3 F+5240 | TGTTTAATCTCATTCTTGGAGACATC  |

|                            |                            |
|----------------------------|----------------------------|
| BUD3 F+5980                | CATAAAGTACACAGGTCATGGTTCCG |
| PDC1 F-1081                | CACCGCGTAAACTCTCTTAACATAC  |
| PDC1 F+33                  | TAACTCACGCAAAATAACACAGTC   |
| PDC1 F+516                 | TGACTTCACTGTTTTCCACAGAATG  |
| PDC1 F+922                 | AGTTAAGGAAGCCGTTGAATCTG    |
| PDC1 F+1629                | CTAAGGACTATGAAACCCACAGAGT  |
| PDC1 F+2058                | TAAGTCTGGGTCCGCTTCTTTAC    |
| PDC1 F+2101                | AATGGTTACTCAATTCAAAACCTGCC |
| FAS2 F-684                 | GGCACCAAGAGTTATTGAAACTAGA  |
| FAS2 F+245                 | CACTGAAAGGGTTGTTGAAATCG    |
| FAS2 F+1206                | AATGGACTTGGATAACGGTGAAAG   |
| FAS2 F+2877                | CAAAAATCACCTGTTATGGCTGAC   |
| FAS2 F+5361                | CATTGAAACTGCCAAGATGATTG    |
| FAS2 F+5779                | AACGTGTCGCTTCTATTTATCAGAC  |
| FAS2 F+6246                | AATACTCAGGGAAGAGAAAAATCG   |
| RPL22A F-481               | GACGATTCTGTGAAAACCTACTTCC  |
| RPL22A F+216               | GCGTCTATGTGTTTAGTTGCTTTTC  |
| RPL22A F+440               | TTAATAGCAGTAGGCAACTTTGTGG  |
| RPL22A F+1134              | TCTCAGTTTCCAATTAACATGAATCC |
| RPL10 F-208                | ATTATAGTAGCGGTTATTTCCGTGG  |
| RPL10 F+129                | GATACCAAAGAACAAGCCTTACC    |
| RPL10 F+387                | TTAAGAGTCAGAGTCCATCCTTTC   |
| RPL10 F+922                | TTTAAAGTTCAGCATGTTGGGTAG   |
| ARS504F (internal control) | GTCAGACCTGTTCTTTAAGAGG     |

**Table S2. Reverse (R) Primer Sequences Used in Determination of Percent Digestion**

|               |                            |
|---------------|----------------------------|
| HSP82 R-733   | CTCTTAGTAGCCATTCTTTGCCAC   |
| HSP82 R-290   | GAAGGACCTGGTTGGTATTAAGATG  |
| HSP82 R+740   | AATGCTTAACGTACAATGGGTCTTC  |
| HSP82 R+986   | ATGAAAACACGACGAACGTACAAC   |
| HSP82 R+1445  | ATTCATCAATTGGGTCTGGTCAAG   |
| HSP82 R+1838  | AAGTCCTTGACAGTCTTGTCTTGAG  |
| HSP82 R+2189  | ACACACTAGACGCGTCGGAATAG    |
| HSP82 R+2476  | TTCTGCAAGGTCTTATAGTCACTCG  |
| HSP104 R-553  | TTTAAACCATGAAACTCTCGCCAC   |
| HSP104 R-63   | ATCGTTAGAGCCCTTTCTGTAAATTG |
| HSP104 R+782  | TTCTTCGATTTCTTCAAAACACC    |
| HSP104 R+1550 | CCACATTTTGGATCATGGAGTTG    |
| HSP104 R+1922 | ACCTTCATCGTACCCGACATAAC    |
| HSP104 R+2054 | CTACCGTCATCCAACATTTGTAGC   |
| HSP104 R+2147 | TCTTGGATCTTTGATCCTTGTTGAG  |
| HSP104 R+2384 | CACCCATATCATCGGAATAACC     |
| HSP104 R+2756 | TCTTTTGCTCGGGTGTCAAGTTC    |
| HSP104 R+3305 | GATTACATCGTTGGAATCATCG     |
| SSA2 R-850    | GACCAAATGAAAATAAGCAGCTC    |
| SSA2 R-242    | GATGGAATGTTCTAGAAAAAACTTC  |
| SSA2 R+198    | GCTTCATATCACCTTGGACTTCTG   |
| SSA2 R+855    | TCTGGTGATGGAAGGTAGAAATC    |
| SSA2 R+1368   | TTCAATTTGTGGGACACCTCTTG    |
| SSA2 R+1905   | AATACAGAGGAAAGCAAAAGTAAAC  |
| SSA2 R+2297   | GACGCCCTTACGAATAGAACTTTAC  |
| SSA4 R-473    | TCTATAATACCCAATGGTGGGAGAG  |

|             |                            |
|-------------|----------------------------|
| SSA4 R-268  | TGTTACTGTCGTCAAACCTAAGGAG  |
| SSA4 R-65   | GTTGTACCTAAATCAATACCAACAGC |
| SSA4 R+198  | TTTACGTCCGATCAGACGCTTAG    |
| SSA4 R+1079 | TAATACCACCTGCAGTTTCAATACC  |
| SSA4 R+1539 | CTAGCTGATTCTTAGCTTGAACACG  |
| SSA4 R+1962 | TTAAACTCTGGCTTATGACGATGAG  |
| SSA4 R+2255 | GTGTTAAACTCCGGTCAAAGAAAC   |
| HSP12 R-47  | TTCAGAAGCTTTTTACCGAATC     |
| HSP12 R+279 | AAACCATGTAACTACAAAGAGTTCCG |
| HSP12 R+449 | AAGAAGCAACCGCCATGTTTAAG    |
| UBI4 R-38   | CAACTTCCAATGTTATGGTTTTACC  |
| UBI4 R+68   | GAATTTTCGACTTAACGTTGTCTG   |
| UBI4 R+524  | TGAATTTTCGACTTAACGTTGTCTG  |
| UBI4 R+1624 | ATCACCCAGTATCCCTGATTTAC    |
| BUD3 R-766  | CAAGTCTGAAGTTGTAAGTGTCTG   |
| BUD3 R-308  | AAAACCCTAGGTCTTGGCAACTG    |
| BUD3 R-194  | CAGTAGAATGCGAGTACAGACAAAC  |
| BUD3 R+93   | TGATTGAGTGAACACATTATCCGTC  |
| BUD3 R+273  | AAGCATGATGTTCCCTAATTTGTC   |
| BUD3 R+2171 | CTATTAACAGCCCTATGTTTCGTCTG |
| BUD3 R+3332 | GAGAGTTTCTGCGTCAATGTAGATG  |
| BUD3 R+4612 | CAAAGGAACAGTATTACGCTCTGG   |
| BUD3 R+5141 | TAAGAGGTGGTTTGGATGATGTCTC  |
| BUD3 R+5240 | CACTGCGTTCAAGAATACAATTACG  |
| BUD3 R+5980 | AATTTACTGAAGGTGTCAATCCAGG  |
| PDC1 R-1081 | TTTTTCAATTCTGGCCTTTAGGG    |
| PDC1 R+33   | CCCATCTCATACCTTCAACTTCG    |

|                            |                            |
|----------------------------|----------------------------|
| PDC1 R+516                 | AACAACAAGCATCAGCCAAGATAAC  |
| PDC1 R+922                 | TTCTTGCTTCAATGGGGTAGAAG    |
| PDC1 R+1629                | TAAATCGCTTATTGCTTAGCGTTG   |
| PDC1 R+2058                | TGGCAGTTTTGAATTGAGTAACC    |
| PDC1 R+2101                | GGAGCAATCATTTTACATGGACC    |
| FAS2 R-684                 | TTGAGCGTCTTCAACGTTCTTG     |
| FAS2 R+245                 | CTTCAACTTGTGAGCAACCAAAAC   |
| FAS2 R+1206                | AGCTTCACTAACAACCTCTCTATCAA |
| FAS2 R+2877                | TTGACAACCTTATGCTCCAAAGC    |
| FAS2 R+5361                | TTGACGCCTAAGGACTTGAAAAC    |
| FAS2 R+5779                | ATAGAAGAATTGAACGGTGTGTACG  |
| FAS2 R+6246                | AAAGCCAAAGGATGCTTCCCAC     |
| RPL22A R-481               | GACTTCGGCATTAACTCTACAAAG   |
| RPL22A R+216               | CGATTTTCTTTCAATCCCGAAAC    |
| RPL22A R+440               | CACCGTTTTCAGTTGGAGAAGAG    |
| RPL22A R+1134              | AACGGTGACTTTTCATTGTCTTG    |
| RPL10 R-208                | CTAGAGAAACCAAACTGACCATC    |
| RPL10 R+129                | GATTCTCAAGACATGGAAAGGATG   |
| RPL10 R+387                | TTTGTTGACCTGGGAECTTGTATC   |
| RPL10 R+922                | GCTTCATCGTATTGAGGTTGTTTG   |
| ARS504R (internal control) | CATACCCTCGGGTCAAACAC       |

**Table S3. Primer Sequences Used in DNA Sequencing**

| Name        | Sequence (5' → 3')       |
|-------------|--------------------------|
| HSP82 F+740 | AATTAGTCGTCACCAAGGAAGTTG |

|               |                           |
|---------------|---------------------------|
| HSP82 F+2189  | ATGAGGATGAAGAAACAGAGACTGC |
| HSP104 F-63   | AGGCATTGTAATCTTGCCTCAATTC |
| HSP104 F+1550 | CCCTTGATGCTGAACGTAGATATG  |
| SSA2 F+855    | AAGGACTTGTCTACCAACCAAAGAG |

**Table S4. Primer Sequences Used in ChIP Analysis**

| Name                           | Sequence (5' → 3')          |
|--------------------------------|-----------------------------|
| BUD3 ORF F (+2055 to +2279)    | CGTCTTAACCAAACATGACGATAAAC  |
| BUD3 ORF R                     | CTATTAACAGCCCTATGTTTCGTCTG  |
| HSP82 UAS F (-393 to -155)     | CCTCTCTCAACACAGTAATCCATAAAC |
| HSP82 UAS R                    | GAAGGACCTGGTTGGTATTAAGATG   |
| HSP82 PROM F (-292 to -88)     | GTTCGAACAATTCTGGTTCTTTC     |
| HSP82 PROM R                   | TGAGGAGGTCACAGATGTAA        |
| HSP82 ORF F (+1392 to +1522)   | GCCAGAACACCAAAAAGAACATCTAC  |
| HSP82 ORF R                    | ATTCATCAATTGGGTCGGTCAAG     |
| HSP82 3'UTR F (+2036 to +2297) | ATGAGGATGAAGAAACAGAGACTGC   |
| HSP82 3'UTR R                  | ACACACTAGACGCGTCGGAATAG     |

**Table S5. Primer Sequences Used in RT-qPCR Analysis**

| Name                | Sequence (5' → 3')         |
|---------------------|----------------------------|
| HSP82 3'UTR F+2134  | AACATCATGGCCTTGAATAGGTTAT  |
| HSP82 3'UTR R +2228 | CATGCAGATGCCCTATTTACATACTT |
| HSP104 ORF F+1646   | CAGCTGCAAGATTGACTGGTATCC   |
| HSP104 ORF R+1799   | CCTGATCTAGACAATCTAACGGC    |

|                |                         |
|----------------|-------------------------|
| SSA4 ORF F+816 | GTCTTCGTCTGCTCAGACATC   |
| SSA4 ORF R+946 | CCACTGGCTCCAATGTAGATC   |
| SSA2 ORF F+812 | TGTCTTCCTCCGCTCAAAC TTC |
| SSA2 ORF R+949 | CCTTTTCAACTGGGTCCAAAG   |
